# Supplementary material for: Multifunctional streptavidin–biotin conjugates with precise stoichiometries
Source: Royal Society of Chemistry journal article supplement (doi:10.1039/d0sc01589j), 2020-01-01
Supplement: d0sc01589j4.pdf [file d0sc01589j4.pdf]

## Supporting Information

### Multifunctional streptavidin-biotin conjugates with precise stoichiometries

Dongdong Xu<sup>a</sup> and Seraphine V. Wegner<sup>\*a, b</sup>

<sup>a</sup> Max Planck Institute for Polymer Research, Ackermannweg 10, 55128 Mainz, Germany

<sup>b</sup> University of Münster, Institute for Physiological Chemistry and Pathobiochemistry, Waldeyerstr. 15, 48149 Münster, Germany.

E-mail: wegners@mpip-mainz.mpg.de

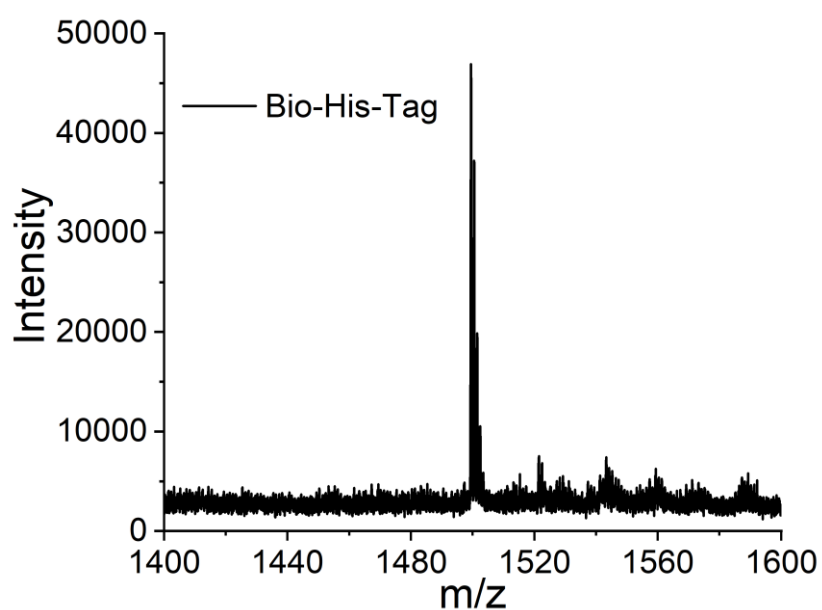

**Fig. S1** MALDI-TOF mass spectrum of biotin-(His)<sub>6</sub> (Bio-His-Tag). The molecular weight is 1500 g/mol.

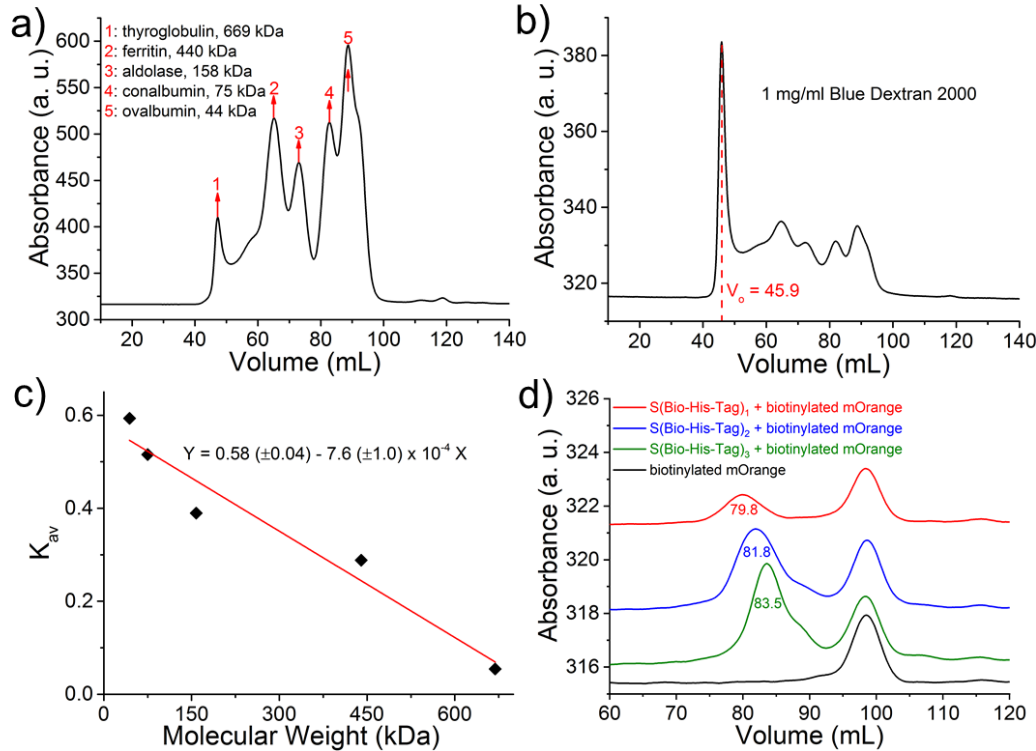

**Fig. S2** a) Chromatogram of standard protein mixture and b) blue dextran 2000 on HiLoad™ 16/600, Superdex™ 200 pg size exclusion column. Elution volumes ( $V_e$ ) for each protein were determined as maximum peak height: peak 1 at 47.2 mL for thyroglobulin (669 kDa), peak 2 at 65.2 mL for ferritin (440 kDa), peak at 73.0 mL for aldolase (158 kDa), peak 4 at 82.7 mL for conalbumin (75 kDa) and peak 5 at 88.7 mL for ovalbumin (44 kDa). The void volume ( $V_0$ ) is the first eluted peak in b) at 45.9 mL. c) Standardization curve of  $K_{av}$  versus protein molecule weight. d) Chromatogram of different streptavidin conjugates (S(Bio-His-Tag)<sub>1</sub> (trivalent), S(Bio-His-Tag)<sub>2</sub> (divalent) and S(Bio-His-Tag)<sub>3</sub> (monovalent)) reacted with biotinylated mOrange. The molecular weights: mOrange (31.3 kDa) streptavidin (53 kDa), Bio-His-Tag (1.5 kDa). The peaks in the chromatogram were for the reaction of biotinylated mOrange with S(Bio-His-Tag)<sub>1</sub>, S(Bio-His-Tag)<sub>2</sub> and S(Bio-His-Tag)<sub>3</sub> were at 79.8 mL, 81.8 mL and 83.5 mL, respectively. The theoretical molecular weight was calculated assuming that all remaining open binding pockets were occupied by biotinylated mOrange. S(Bio-His-Tag)<sub>1</sub>O<sub>3</sub> (theo. 148.4 kDa, exp. 141.0 kDa), S(Bio-His-Tag)<sub>2</sub>O<sub>2</sub> (theo. 118.6 kDa, exp. 108.6 kDa) and S(Bio-His-Tag)<sub>3</sub>O<sub>1</sub> (theo. 88.8 kDa, exp. 81.3 kDa). The theoretical and experimental molecular weights were in

agreement showing that the open binding pockets in the streptavidin Bio-His-Tag conjugates were indeed occupied by biotinylated mOrange.

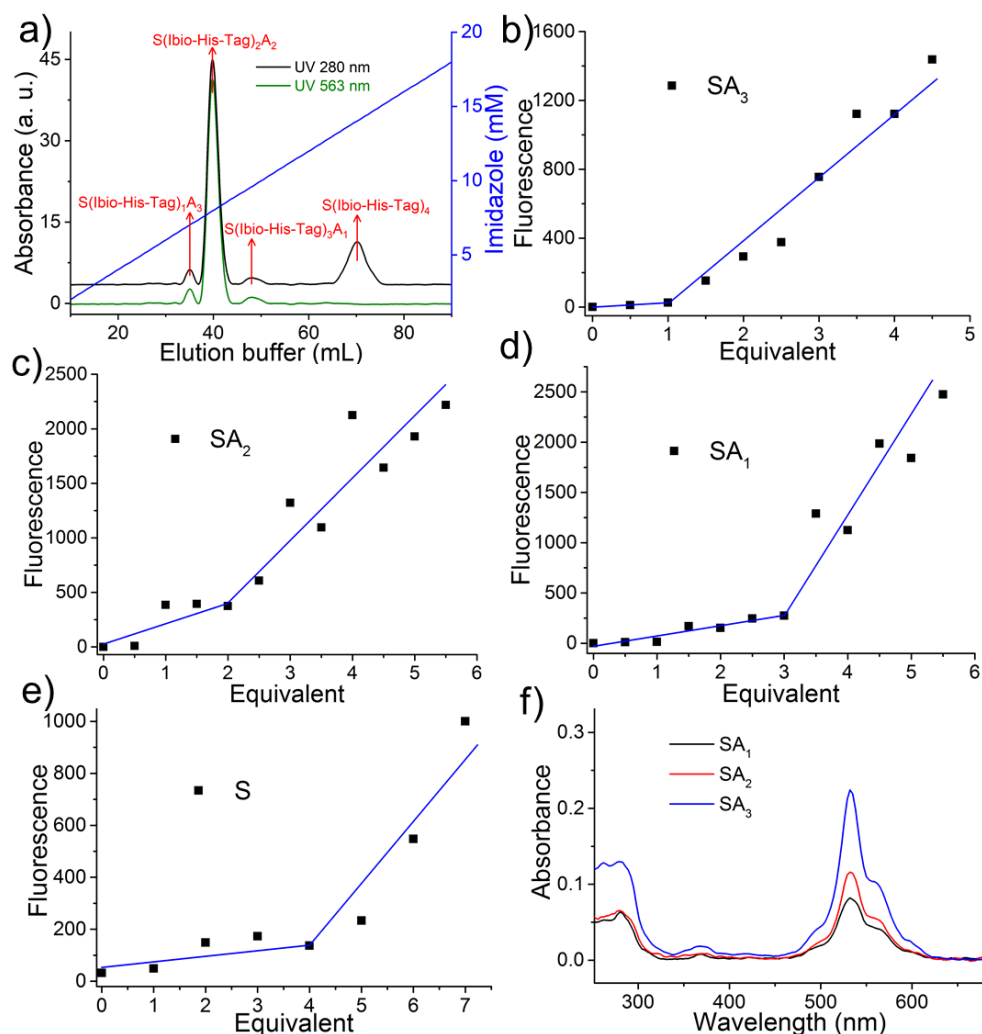

**Fig. S3** a) Chromatogram of the reaction mixture of streptavidin (S) (30  $\mu$ M), which was first reacted with Ibio-His-Tag (90  $\mu$ M) for 15 min and then with atto-565-biotin (A) (50  $\mu$ M) for 15 min, separated on a  $\text{Cu}^{2+}$ -NTA column using an imidazole gradient. The elution of different species was monitored through the absorbance 280 nm (both streptavidin and atto-565-biotin absorb) and 563 nm (only atto-565-biotin absorbs). The different S(Ibio-His-Tag)<sub>n</sub>A<sub>4-n</sub> species eluted at increasing imidazole concentrations as the numbers of Ibio-His-Tags increases from 1 to 4. First peak at 6.9 mM imidazole was S(Ibio-His-Tag)<sub>1</sub>A<sub>3</sub>, second peak at 8.0 mM

imidazole was S(Ibio-His-Tag)<sub>2</sub>A<sub>2</sub>, third peak at 9.6 mM imidazole was S(Ibio-His-Tag)<sub>3</sub>A<sub>1</sub> and the fourth peak at 14.0 mM imidazole S(Ibio-His-Tag)<sub>4</sub> (only observed in the absorbance at 280 nm since it does not contain atto-565-biotin). The relative areas of the peaks are: 5.1% 1<sup>st</sup> peak, 42.6% 2<sup>nd</sup> peak, 26.7% 3<sup>rd</sup> peak and 25.6% 4<sup>th</sup> peak. b-e) The Ibio-His-Tag was removed from the different S(Ibio-His-Tag)<sub>n</sub>A<sub>4-n</sub> species through acidification to yield the corresponding SA<sub>4-n</sub>. The open biotin binding pockets of b) SA<sub>3</sub>, c) SA<sub>2</sub>, d) SA<sub>1</sub> and e) S were titrated with the fluorophore biotin-5-fluorescein, which is quenched upon binding to streptavidin. SA<sub>3</sub>, SA<sub>2</sub>, SA<sub>1</sub> and S required 1, 2, 3 and 4 equivalents the dye to saturate all biotin binding sites, respectively. (f) The UV-vis absorption spectra of SA<sub>1</sub>, SA<sub>2</sub> and SA<sub>3</sub> measured by Nanodrop (ND 8000, 8-sample spectrophotometer, light path= 1 mm). The absorbance at 280 nm and 532 nm were used confirm the stoichiometry of these streptavidin conjugates, as shown in Table S1.

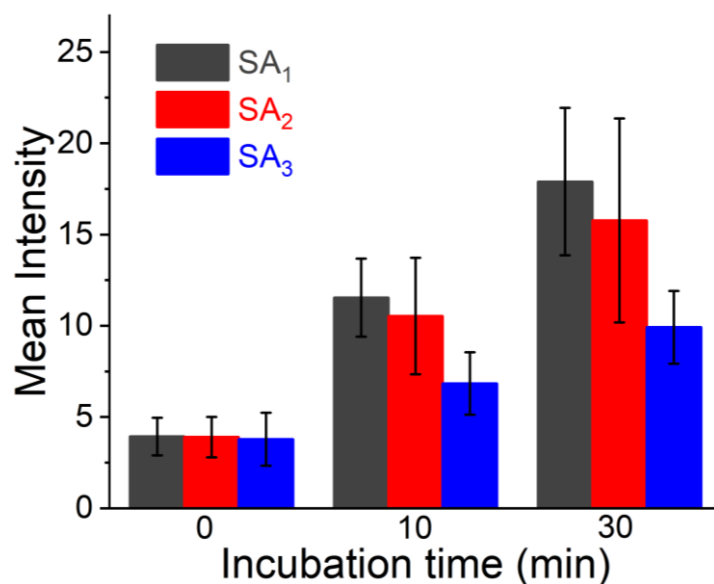

**Fig. S4** Intracellular fluorescence intensity of cells with biotinylated surface proteins and labelled with different streptavidin conjugates. 25 cells were analysed per data point. The error bars represent the standard error.

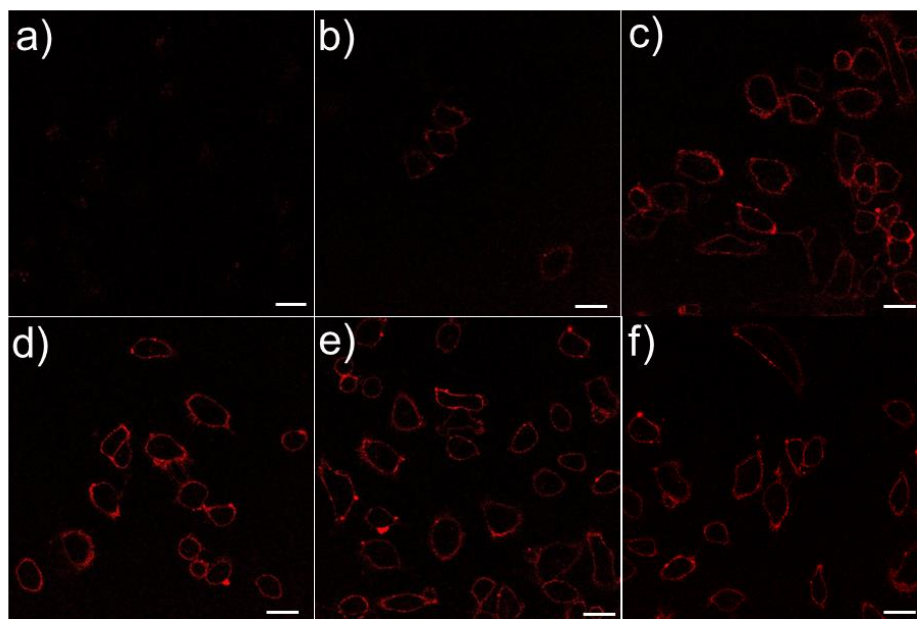

**Fig. S5** Fluorescent images in the atto-565 channel of cells with biotinylated surfaces, which were incubated with different concentrations of SA<sub>3</sub>. a) 0  $\mu\text{M}$  b) 0.05  $\mu\text{M}$ . c) 0.1  $\mu\text{M}$ . d) 0.5  $\mu\text{M}$ . e) 1.0  $\mu\text{M}$  and f) 1.5  $\mu\text{M}$ . Scale bar: 25  $\mu\text{m}$ .

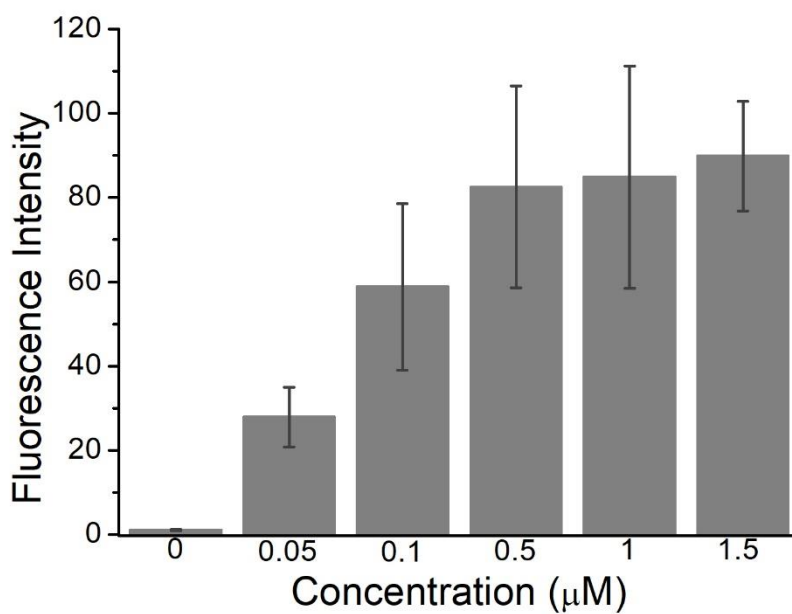

**Fig. S6** Fluorescence intensity at the cell membrane of cells in Fig. S5. For each concentration 15 cells were analysed. The error bars represent the standard error.

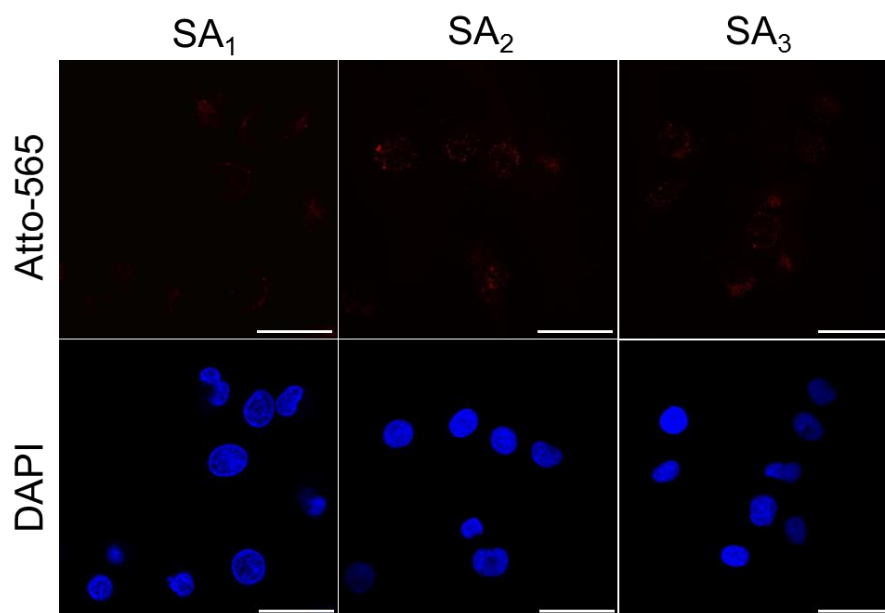

**Fig. S7** Confocal microscopy images of folate-receptor positive MDA-MB-231 cells incubated with atto-565 (A) (shown red) streptavidin conjugates with different stoichiometries. Cells were incubated with  $1\mu\text{M}$  SA<sub>1</sub>, SA<sub>2</sub> or SA<sub>3</sub> with RPMI-1640 (no folic acid) medium for 4h at 37 °C. Cell nuclei were stained with DAPI (shown blue). Scale bars are 50  $\mu\text{m}$ .

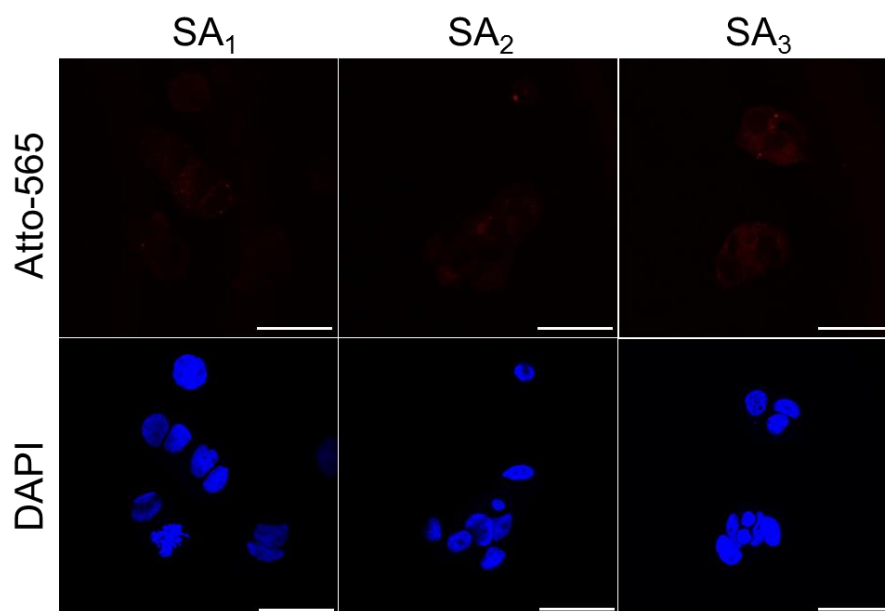

**Fig. S8** Confocal microscopy images of folate-receptor negative MCF-7 cells incubated with atto-565 (A) (shown red) streptavidin conjugates with different stoichiometries. Cells were incubated with  $1\mu\text{M}$  SA<sub>1</sub>, SA<sub>2</sub> or SA<sub>3</sub> with RPMI-1640 (no folic acid) medium for 4h at 37 °C. Cell nuclei were stained with DAPI (shown blue). Scale bars are 50  $\mu\text{m}$ .

**Table S1** The concentrations of SA<sub>1</sub>, SA<sub>2</sub> and SA<sub>3</sub> were calculated based on the extinction coefficients of pure streptavidin (41326 M<sup>-1</sup> cm<sup>-1</sup> at 280 nm) and atto-565-biotin (36734 M<sup>-1</sup> cm<sup>-1</sup> at 280 nm and 91835 M<sup>-1</sup> cm<sup>-1</sup> at 532 nm) and the stoichiometry of the streptavidin conjugate. Light path= 1 mm,  $\epsilon_{280}(\text{SA}_n) = \epsilon_{280}(\text{S}) + n \times \epsilon_{280}(\text{A})$ .  $\epsilon_{532}(\text{SA}_n) = n \times \epsilon_{532}(\text{A})$ . The concentrations determined based on the absorbance at 280 nm and 532 nm were in agreement confirming the assumed stoichiometry of the SA<sub>1-3</sub>.

|                       | <b>A<sub>280</sub></b> | <b><math>\epsilon_{280}(\text{M}^{-1} \text{cm}^{-1})</math></b> | <b>C<sub>280</sub> (<math>\mu\text{M}</math>)</b> | <b>A<sub>532</sub></b> | <b><math>\epsilon_{532}(\text{M}^{-1} \text{cm}^{-1})</math></b> | <b>C<sub>532</sub> (<math>\mu\text{M}</math>)</b> |
|-----------------------|------------------------|------------------------------------------------------------------|---------------------------------------------------|------------------------|------------------------------------------------------------------|---------------------------------------------------|
| <b>SA<sub>1</sub></b> | 0.0653                 | 78060                                                            | 8.37                                              | 0.0801                 | 91835                                                            | 8.71                                              |
| <b>SA<sub>2</sub></b> | 0.0664                 | 114794                                                           | 5.78                                              | 0.1108                 | 183670                                                           | 5.99                                              |
| <b>SA<sub>3</sub></b> | 0.1296                 | 151528                                                           | 8.55                                              | 0.2243                 | 275505                                                           | 8.14                                              |

**Table S2** The relative fluorescence brightness's of SA<sub>1</sub>F<sub>3</sub>, SA<sub>2</sub>F<sub>2</sub> and SA<sub>3</sub>F<sub>1</sub> were measured in solution and used to normalize the fluorescence intensities measured in confocal images for quantification in Figure 4b.

|                                    | <b># A</b> | <b>Cons. (nM)</b> | <b>Fluorescence</b> | <b>Fluorescence / nM</b> | <b>Relative fluorescence brightness</b> |
|------------------------------------|------------|-------------------|---------------------|--------------------------|-----------------------------------------|
| <b>SA<sub>1</sub>F<sub>3</sub></b> | 1          | 466               | 2200                | 4.721                    | 1                                       |
| <b>SA<sub>2</sub>F<sub>2</sub></b> | 2          | 378               | 2414                | 6.386                    | 1.353                                   |
| <b>SA<sub>3</sub>F<sub>1</sub></b> | 3          | 319               | 2927                | 9.176                    | 1.944                                   |
